# Supplementary material for: Phosphoenolpyruvate Carboxykinase, a Key Enzyme That Controls Blood Glucose, Is a Target of Retinoic Acid Receptor-Related Orphan Receptor α
Source: PubMed Central journal article supplement (PMC4575163; doi:10.1371/journal.pone.0137955), 2015-09-18
Supplement: pone.0137955.s001.pdf [file pone.0137955.s001.pdf]

S1 Table. Primers. Mutated sequences are underlined.

| Primer                                             | Sequence (5'–3')                        |
|----------------------------------------------------|-----------------------------------------|
| <b><i>Electrophoresis mobility shift assay</i></b> |                                         |
| PEPCK-ROREwt-sense                                 | GCAGTAAAATGGGTCAAGGT                    |
| PEPCK-ROREwt-antisense                             | ACCTTGACCCATTTTACTGC                    |
| PEPCK-ROREmt-sense                                 | GCAG <u>CGCC</u> ATGGGTCAAGGT           |
| PEPCK-ROREmt-antisense                             | ACCTTGACCCAT <u>GCGC</u> CTGC           |
| Ikb-RORE-sense                                     | GCAGCGCCATGGGTCAAGGT                    |
| Ikb-RORE-antisense                                 | ACCTTGACCCATGGCGCTGC                    |
| <b><i>Luciferase reporter cloning</i></b>          |                                         |
| proPEPCK-FW                                        | GGTTCGCTAGCTGAGTTTGGTCCGGAGG            |
| proPEPCK-RV                                        | CAGCAAGCTTGTGTTCCAGTGGGAAG              |
| proPEPCK-ROREmt-FW                                 | CAGCAG <u>CGCC</u> ATGGGTCAAGGTTTAGTCAG |
| proPEPEK-ROREmt-RV                                 | CTGACTAAACCTTGACCCAT <u>GCGC</u> CTGCTG |
| proPEPCK-C3mt-FW                                   | GAAAAGGGTGTGTGTTT <u>CCGG</u> ACAGCAG   |
| proPEPEK-C3mt-RV                                   | CTGCTGT <u>CCGG</u> AAACACAACACCCTTTC   |
| PGVB2-FW                                           | CAAGTGCAGGTGCCAGAAC                     |
| PGVB2-RV                                           | CACCTCGATATGTGCATCTG                    |
| <b><i>qRT-PCR</i></b>                              |                                         |
| rtPEPCK-FW                                         | AAGAAGTGCTTTGCTCTCAG                    |
| rtPEPCK-RV                                         | GCCATTTTCTGGGTGATGG                     |
| rtRORA-FW                                          | TGTGATCGCAGCGATGAAAG                    |
| rtRORA-RV                                          | ACAGGAGTAGGTGGCATTGC                    |
| rtACTB-FW                                          | GCACCACACCTTCTACAATG                    |
| rtACTB-RV                                          | CTCAAACATGATCTGGGTCATC                  |
| rt18SrRNA-FW                                       | CGATAACGAACGAGACTCTGG                   |
| rt18SrRNA-RV                                       | TAGGGTAGGCACACGCTGAGC                   |
