# Supplementary material for: Phosphoenolpyruvate Carboxykinase, a Key Enzyme That Controls Blood Glucose, Is a Target of Retinoic Acid Receptor-Related Orphan Receptor α
Source: PubMed Central journal article supplement (PMC4575163; doi:10.1371/journal.pone.0137955), 2015-09-18
Supplement: pone.0137955.s002.pdf [file pone.0137955.s002.pdf]

S2 Table. siRNAs. Synthesized siRNA sequence are underlined.

| Primer                 | Sequence (5'-3')                                                 |
|------------------------|------------------------------------------------------------------|
| siGFP-sense-u          | GATCACTAATACGACTCACTATAGGG <u>CAAGCTGACCCTGAAGTTCTT</u>          |
| siGFP-sense-d          | <u>AAGA</u> ACTTCAGGGTCAGCTT <u>GCCCTATAGTGAGTCGTATTAGTGATC</u>  |
| siGFP-antisense-u      | GATCACTAATACGACTCACTATAGGG <u>GAACTTCAGGGTCAGCTTGT</u>           |
| siGFP-antisense-d      | <u>AACA</u> AGCTGACCCTGAAGTT <u>CCCCTATAGTGAGTCGTATTAGTGATC</u>  |
| siRORA258-sense-u      | GATCACTAATACGACTCACTATAGGG <u>GTCAGAAGA</u> ACTGTTT <u>GATTT</u> |
| siRORA258-sense-d      | <u>AAATCAAACAGTTCTTCTGAC</u> CCCTATAGTGAGTCGTATTAGTGATC          |
| siRORA258-antisense-u  | GATCACTAATACGACTCACTATAGGG <u>ATCAAACAGTTCTTCTGACTT</u>          |
| siRORA258-antisense-d  | <u>AAGTCAGAAGA</u> ACTGTTT <u>GAT</u> CCCTATAGTGAGTCGTATTAGTGATC |
| siRORA1388-sense-u     | GATCACTAATACGACTCACTATAGGG <u>GCTAATGGCATT</u> TAAAGCAATT        |
| siRORA1388-sense-d     | <u>AATTGCTTTAAATGCCATTAG</u> CCCTATAGTGAGTCGTATTAGTGATC          |
| siRORA1388-antisense-u | GATCACTAATACGACTCACTATAGGG <u>TGCTTTAAATGCCATTAGTT</u>           |
| siRORA1388-antisense-d | <u>AACTAATGGCATT</u> TAAAGCAACCCTATAGTGAGTCGTATTAGTGATC          |
| siRORAmt-sense-u       | GATCACTAATACGACTCACTATAGGG <u>GATTACAACGAATCTAAGTTT</u>          |
| siRORAmt-sense-d       | <u>AAACTTAGATT</u> CGTTGTAAT <u>CCCCTATAGTGAGTCGTATTAGTGATC</u>  |
| siRORAmt-antisense-u   | GATCACTAATACGACTCACTATAGGG <u>ACTTAGATT</u> CGTTGTAATCTT         |
| siRORAmt-antisense-d   | <u>AAGATTACAACGAATCTAAGT</u> CCCTATAGTGAGTCGTATTAGTGATC          |
